# Supplementary material for: Helichrysum microphyllum subsp. tyrrhenicum, Its Root-Associated Microorganisms, and Wood Chips Represent an Integrated Green Technology for the Remediation of Petroleum Hydrocarbon-Contaminated Soils
Source: MDPI journal article supplement (doi:10.3390/agronomy13030812), 2023-03-10
Supplement: s1 [file s1]

## SUPPLEMENTARY MATERIAL

*Helichrysum microphyllum* subsp. *tyrrhenicum*, its root associated microorganisms, and wood chips represent an integrated green technology for remediation of petroleum hydrocarbon-contaminated soils

Mandaresu M., Dessì L., Lallai A., Porceddu M., Boi M. E., Bacchetta G., Pivetta T., Lussu R., Ardu R., Pinna M., Meloni F., Sanjust E., Tamburini E.

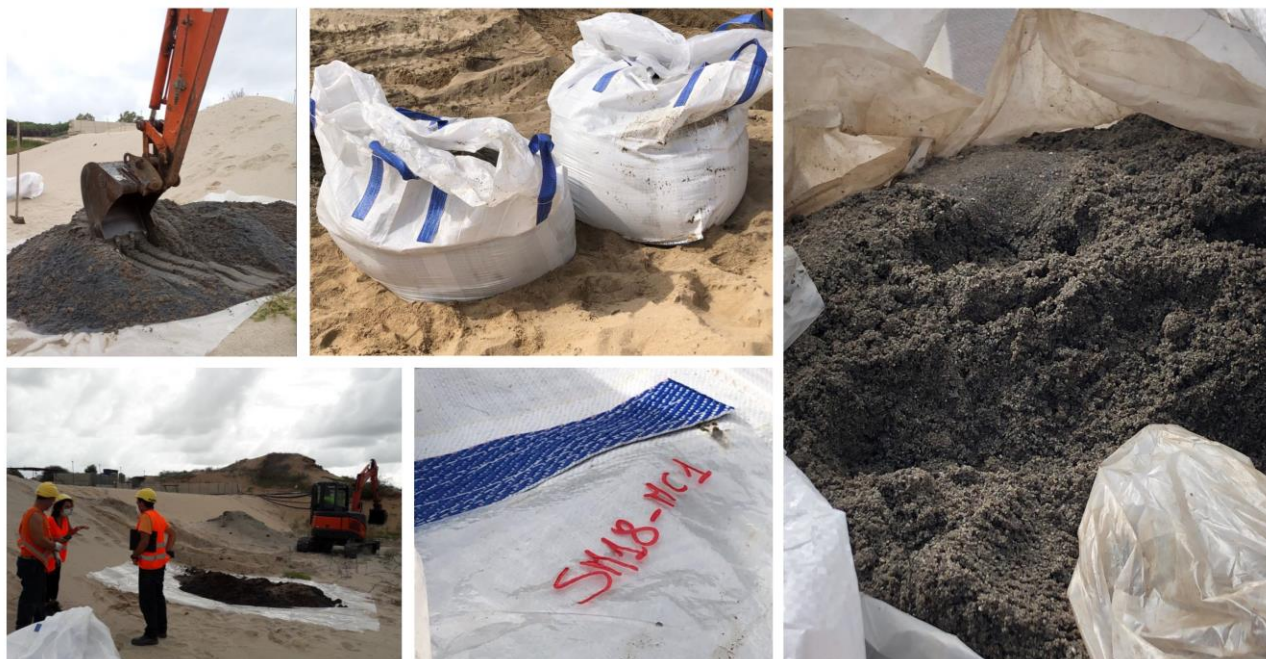

**Figure S1.** Sampling of contaminated substrate at the former SIPSA Srl plant (Brabau - Torregrande, OR, Italy).

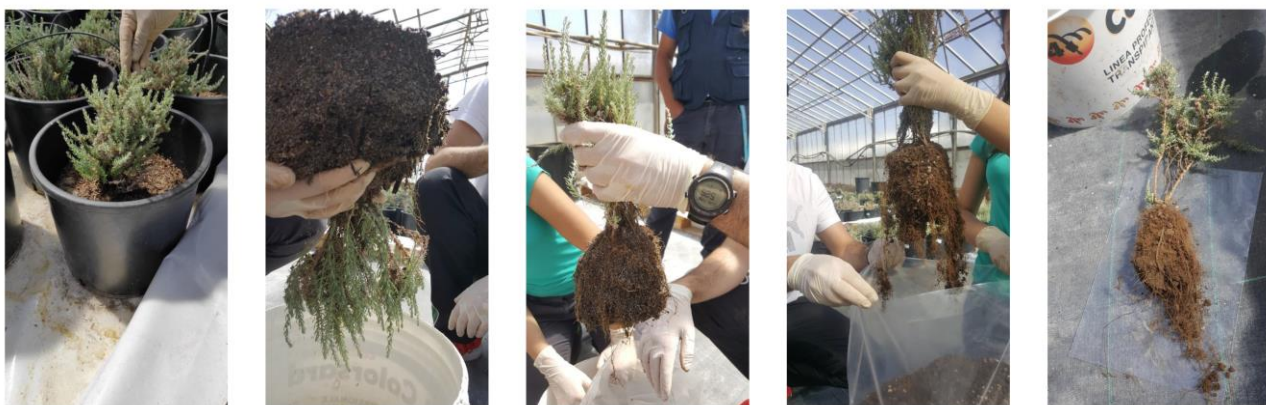

**Figure S2.** Samplings of substrates and plants at the end of the phytoremediation test with *Helichrysum microphyllum* subsp. *tyrrhenicum* in refinery substrate with aged contamination (July 2021).

**Table S1.** Main characteristics of refinery substrate and organic amendment.

| Parameter                                                          | Substrate | Wood chips |
|--------------------------------------------------------------------|-----------|------------|
| Substrate moisture (%)                                             | 12%       | 49%        |
| Substrate pH (H <sub>2</sub> O)                                    | 8.4 ± 0.2 | 7.2 ± 0.1  |
| Total petroleum hydrocarbons (g kg <sup>-1</sup> dry w)            | 3.3 ± 0.8 | nd         |
| Dehydrogenase activity (INT-F g <sup>-1</sup> wet w)               | 6.0 ± 5.4 | 15.8 ± 0.3 |
| Viable titer of fungi (log MPN g <sup>-1</sup> wet w)              | 3.2 ± 0.2 | 7.6 ± 0.4  |
| Viable titer of bacteria (log MPN g <sup>-1</sup> wet w)           | 5.1 ± 0.4 | 7.7 ± 0.2  |
| Viable titer of diesel degraders (log MPN g <sup>-1</sup> wet w)   | 5.4 ± 0.3 | 8.5 ± 0.4  |
| Viable titer of paraffin degraders (log MPN g <sup>-1</sup> wet w) | 4.9 ± 0.1 | 8.0 ± 0.5  |

**Table S2.** Statistical analysis of growth parameters (plant height, crown diameter, stem base diameter) of *H. tyrrhenicum* measured at the beginning and at the end of the greenhouse test in three different substrates.

|                         |               |      |        | Kruskal-Wallis |         |
|-------------------------|---------------|------|--------|----------------|---------|
|                         |               |      |        | Chi-sqr        | p       |
| Height (cm)             |               | mean | dev.st |                |         |
| GARD                    | initial (0 d) | 20.5 | 2.8    | 33.6           | 6.7E-09 |
|                         | final (199 d) | 26.9 | 3.7    |                |         |
| UNAM                    | initial (0 d) | 20.5 | 3.5    | 2.6            | 0.11    |
|                         | final (199 d) | 22.3 | 5.1    |                |         |
| WCAM                    | initial (0 d) | 20.8 | 3.4    | 10.5           | 1.2E-03 |
|                         | final (199 d) | 24.3 | 4.2    |                |         |
| Crown diameter (cm)     |               |      |        |                |         |
| GARD                    | initial (0 d) | 9.3  | 2.5    | 43.8           | 3.7E-11 |
|                         | final (199 d) | 20.6 | 4.9    |                |         |
| UNAM                    | initial (0 d) | 11.0 | 4.0    | 9.3            | 2.2E-03 |
|                         | final (199 d) | 8.0  | 2.7    |                |         |
| WCAM                    | initial (0 d) | 9.5  | 2.3    | 10.5           | 1.2E-03 |
|                         | final (199 d) | 11.9 | 2.8    |                |         |
| Stem base diameter (cm) |               |      |        |                |         |
| GARD                    | initial (0 d) | 0.3  | 0.1    | 39.2           | 3.1E-10 |
|                         | final (199 d) | 0.5  | 0.1    |                |         |
| UNAM                    | initial (0 d) | 0.3  | 0.1    | 11.8           | 5.4E-04 |
|                         | final (199 d) | 0.4  | 0.1    |                |         |
| WCAM                    | initial (0 d) | 0.2  | 0.1    | 27.9           | 1.0E-07 |
|                         | final (199 d) | 0.4  | 0.1    |                |         |

GARD: commercial garden substrate, UNAM: contaminated substrate without amendment, WCAM: contaminated substrate amended with wood chips.

**Table S3.** Statistical analysis of growth parameters (plant height, crown diameter, stem base diameter) of *H. tyrrhenicum* measured at each kinetic time during the greenhouse test in three different substrates.

| Day | Test | Height (cm) |        |                |         | Crown diameter (cm) |      |         |        |                |       |              |         | Stem base diameter (cm) |         |                |       |              |      |         |
|-----|------|-------------|--------|----------------|---------|---------------------|------|---------|--------|----------------|-------|--------------|---------|-------------------------|---------|----------------|-------|--------------|------|---------|
|     |      |             |        | Kruskal-Wallis |         | Mann-Whitney        |      |         |        | Kruskal-Wallis |       | Mann-Whitney |         |                         |         | Kruskal-Wallis |       | Mann-Whitney |      |         |
|     |      | mean        | dev.st | Chi-sqr        | p       | Comparison          | p    | mean    | dev.st | Chi-sqr        | p     | Comparison   | p       | mean                    | dev.st  | Chi-sqr        | p     | Comparison   | p    |         |
| 0   | GARD | 20.5        | 2.8    | 0.459          | 0.795   | ND                  | 9.3  | 2.5     | 3.17   | 0.2045         | ND    | 0.258        | 0.075   | 4.60                    | 0.100   | ND             |       |              |      |         |
|     | UNAM | 20.5        | 3.5    |                |         |                     | 11.0 | 4.0     |        |                |       | 0.281        | 0.121   |                         |         |                |       |              |      |         |
|     | WCAM | 20.8        | 3.4    |                |         |                     | 9.5  | 2.3     |        |                |       | 0.232        | 0.087   |                         |         |                |       |              |      |         |
| 14  | GARD | 20.8        | 2.9    | 0.489          | 0.783   | ND                  | 9.9  | 2.5     | 1.32   | 0.5171         | ND    | 0.277        | 0.096   | 0.81                    | 0.666   | ND             |       |              |      |         |
|     | UNAM | 20.8        | 3.4    |                |         |                     | 10.8 | 3.3     |        |                |       | 0.284        | 0.129   |                         |         |                |       |              |      |         |
|     | WCAM | 21.1        | 3.3    |                |         |                     | 9.8  | 2.3     |        |                |       | 0.256        | 0.082   |                         |         |                |       |              |      |         |
| 28  | GARD | 21.7        | 3.0    | 0.955          | 0.620   | ND                  | 10.5 | 2.3     | 1.48   | 0.4765         | ND    | 0.273        | 0.070   | 2.30                    | 0.315   | ND             |       |              |      |         |
|     | UNAM | 21.3        | 3.5    |                |         |                     | 10.8 | 3.1     |        |                |       | 0.282        | 0.133   |                         |         |                |       |              |      |         |
|     | WCAM | 21.6        | 3.4    |                |         |                     | 9.9  | 2.3     |        |                |       | 0.253        | 0.090   |                         |         |                |       |              |      |         |
| 43  | GARD | 22.1        | 2.9    | 0.499          | 0.779   | ND                  | 11.0 | 2.5     | 1.32   | 0.5164         | ND    | 0.284        | 0.069   | 3.40                    | 0.182   | ND             |       |              |      |         |
|     | UNAM | 21.9        | 3.7    |                |         |                     | 11.0 | 3.0     |        |                |       | 0.280        | 0.132   |                         |         |                |       |              |      |         |
|     | WCAM | 21.9        | 3.5    |                |         |                     | 10.2 | 2.4     |        |                |       | 0.266        | 0.092   |                         |         |                |       |              |      |         |
| 56  | GARD | 22.6        | 3.0    | 1.097          | 0.578   | ND                  | 11.3 | 2.3     | 1.61   | 0.4472         | ND    | 0.300        | 0.072   | 4.10                    | 0.128   | ND             |       |              |      |         |
|     | UNAM | 22.2        | 3.8    |                |         |                     | 10.9 | 2.9     |        |                |       | 0.289        | 0.135   |                         |         |                |       |              |      |         |
|     | WCAM | 22.2        | 3.6    |                |         |                     | 10.5 | 2.4     |        |                |       | 0.280        | 0.093   |                         |         |                |       |              |      |         |
| 70  | GARD | 22.8        | 2.7    | 2.127          | 0.345   | ND                  | 11.6 | 2.2     | 2.85   | 0.2404         | ND    | 0.318        | 0.075   | 4.71                    | 0.094   | ND             |       |              |      |         |
|     | UNAM | 22.2        | 3.9    |                |         |                     | 10.9 | 2.9     |        |                |       | 0.305        | 0.143   |                         |         |                |       |              |      |         |
|     | WCAM | 22.2        | 3.6    |                |         |                     | 10.6 | 2.5     |        |                |       | 0.286        | 0.095   |                         |         |                |       |              |      |         |
| 84  | GARD | 23.0        | 2.8    | 1.966          | 0.374   | ND                  | 12.0 | 2.2     | 4.15   | 0.1256         | ND    | 0.344        | 0.084   | 7.65                    | 0.022   | GARD           | UNAM  | 0.091        |      |         |
|     | UNAM | 22.4        | 4.1    |                |         |                     | 11.1 | 2.9     |        |                |       | 0.308        | 0.146   |                         |         | GARD           | WCAM  | 0.031        |      |         |
|     | WCAM | 22.3        | 3.6    |                |         |                     | 10.7 | 2.5     |        |                |       | 0.298        | 0.095   |                         |         | UNAM           | WCAM  | 1.000        |      |         |
| 102 | GARD | 23.3        | 2.7    | 3.443          | 0.179   | ND                  | 12.2 | 2.3     | 2.95   | 0.2285         | ND    | 0.359        | 0.088   | 8.36                    | 0.015   | GARD           | UNAM  | 0.097        |      |         |
|     | UNAM | 22.4        | 4.2    |                |         |                     | 11.1 | 3.0     |        |                |       | 0.315        | 0.140   |                         |         | GARD           | WCAM  | 0.015        |      |         |
|     | WCAM | 22.5        | 3.7    |                |         |                     | 11.1 | 2.6     |        |                |       | 0.306        | 0.094   |                         |         | UNAM           | WCAM  | 1.000        |      |         |
| 112 | GARD | 23.4        | 2.7    | 3.250          | 0.197   | ND                  | 12.5 | 2.7     | 3.97   | 0.137          | ND    | 0.525        | 0.849   | 8.45                    | 0.015   | GARD           | UNAM  | 0.076        |      |         |
|     | UNAM | 22.5        | 4.2    |                |         |                     | 11.0 | 3.1     |        |                |       | 0.327        | 0.127   |                         |         | GARD           | WCAM  | 0.018        |      |         |
|     | WCAM | 22.7        | 3.6    |                |         |                     | 11.1 | 2.5     |        |                |       | 0.321        | 0.089   |                         |         | UNAM           | WCAM  | 1.000        |      |         |
| 130 | GARD | 23.7        | 2.8    | 4.506          | 0.105   | ND                  | 14.3 | 3.3     | 20.60  | 3.2E-05        | GARD  | UNAM         | 2.4E-04 | 0.405                   | 0.081   | GARD           | UNAM  | 0.008        |      |         |
|     | UNAM | 22.4        | 4.1    |                |         |                     | 10.7 | 3.1     |        |                | GARD  | WCAM         | 5.3E-04 | 0.335                   | 0.122   | GARD           | WCAM  | 0.002        |      |         |
|     | WCAM | 22.9        | 3.7    |                |         |                     | 11.4 | 2.7     |        |                | UNAM  | WCAM         | 0.791   | 0.334                   | 0.100   | UNAM           | WCAM  | 1.000        |      |         |
| 144 | GARD | 23.9        | 2.7    | 5.670          | 0.059   | ND                  | 15.2 | 3.2     | 34.25  | 3.5E-08        | GARD  | UNAM         | 2.5E-07 | 0.437                   | 0.075   | GARD           | UNAM  | 0.002        |      |         |
|     | UNAM | 22.3        | 4.0    |                |         |                     | 9.9  | 3.4     |        |                | GARD  | WCAM         | 5.1E-05 | 0.360                   | 0.120   | GARD           | WCAM  | 2.9E-05      |      |         |
|     | WCAM | 23.2        | 3.7    |                |         |                     | 11.7 | 2.8     |        |                | UNAM  | WCAM         | 0.129   | 0.343                   | 0.106   | UNAM           | WCAM  | 1.000        |      |         |
| 158 | GARD | 24.4        | 2.7    | 8.864          | 0.012   | GARD                | UNAM | 0.010   | 16.2   | 3.3            | 44.91 | 1.7E-10      | GARD    | UNAM                    | 2.2E-09 | 0.465          | 0.075 | GARD         | UNAM | 9.7E-04 |
|     | UNAM | 22.2        | 4.0    |                |         | GARD                | WCAM | 0.169   | 9.5    | 2.8            |       |              | GARD    | WCAM                    | 1.5E-05 | 0.375          | 0.124 | GARD         | WCAM | 1.2E-04 |
|     | WCAM | 23.2        | 3.8    |                |         | UNAM                | WCAM | 0.944   | 12.0   | 2.8            |       |              | UNAM    | WCAM                    | 0.009   | 0.366          | 0.112 | UNAM         | WCAM | 1.000   |
| 175 | GARD | 25.0        | 3.0    | 12.890         | 0.002   | GARD                | UNAM | 0.002   | 17.3   | 3.4            | 56.86 | 4.4E-13      | GARD    | UNAM                    | 2.0E-10 | 0.491          | 0.081 | GARD         | UNAM | 3.7E-05 |
|     | UNAM | 22.1        | 4.1    |                |         | GARD                | WCAM | 0.089   | 8.9    | 2.6            |       |              | GARD    | WCAM                    | 7.3E-08 | 0.385          | 0.112 | GARD         | WCAM | 9.5E-05 |
|     | WCAM | 23.4        | 3.8    |                |         | UNAM                | WCAM | 0.370   | 11.8   | 2.8            |       |              | UNAM    | WCAM                    | 9.8E-04 | 0.384          | 0.117 | UNAM         | WCAM | 1.000   |
| 184 | GARD | 25.7        | 3.1    | 18.290         | 1.1E-04 | GARD                | UNAM | 8.4E-05 | 18.6   | 4.0            | 59.91 | 9.6E-14      | GARD    | UNAM                    | 1.9E-10 | 0.521          | 0.109 | GARD         | UNAM | 2.7E-06 |
|     | UNAM | 21.8        | 4.3    |                |         | GARD                | WCAM | 0.053   | 8.3    | 2.9            |       |              | GARD    | WCAM                    | 2.1E-08 | 0.357          | 0.129 | GARD         | WCAM | 7.3E-05 |
|     | WCAM | 23.8        | 4.0    |                |         | UNAM                | WCAM | 0.126   | 11.8   | 2.8            |       |              | UNAM    | WCAM                    | 1.5E-04 | 0.390          | 0.127 | UNAM         | WCAM | 0.777   |
| 199 | GARD | 26.9        | 3.7    | 20.600         | 3.3E-05 | GARD                | UNAM | 4.3E-05 | 20.6   | 4.9            | 63.39 | 1.7E-14      | GARD    | UNAM                    | 2.0E-10 | 0.532          | 0.119 | GARD         | UNAM | 1.5E-05 |
|     | UNAM | 22.3        | 5.1    |                |         | GARD                | WCAM | 0.018   | 8.0    | 2.7            |       |              | GARD    | WCAM                    | 5.2E-09 | 0.380          | 0.109 | GARD         | WCAM | 4.4E-05 |
|     | WCAM | 24.3        | 4.2    |                |         | UNAM                | WCAM | 0.104   | 11.9   | 2.8            |       |              | UNAM    | WCAM                    | 1.7E-05 | 0.390          | 0.127 | UNAM         | WCAM | 1.000   |

GARD: commercial garden substrate, UNAM: contaminated substrate without amendment, WCAM: contaminated substrate amended with wood chips.

**Table S4.** Statistical analysis of dry biomasses of *H. tyrrhenicum* at the end of the greenhouse test in three different substrates.

|                                           |      |        | Kruskal-Wallis |       | Mann-Whitney |      |       |
|-------------------------------------------|------|--------|----------------|-------|--------------|------|-------|
|                                           | mean | dev.st | Chi-sqr        | p     | Comparison   |      | p     |
| Dry biomass (g dry w) of epigeal tissues  |      |        |                |       |              |      |       |
| GARD                                      | 40.9 | 12.2   | 9.38           | 0.009 | GARD         | UNAM | 0.037 |
| UNAM                                      | 15.6 | 4.3    |                |       | GARD         | WCAM | 0.037 |
| WCAM                                      | 14.4 | 8.8    |                |       | UNAM         | WCAM |       |
| Dry biomass (g dry w) of hypogeal tissues |      |        |                |       |              |      |       |
| GARD                                      | 8.0  | 4.2    | 5.58           | 0.061 | ND           |      |       |
| UNAM                                      | 5.6  | 4.8    |                |       |              |      |       |
| WCAM                                      | 3.1  | 2.7    |                |       |              |      |       |

GARD: commercial garden substrate, UNAM: contaminated substrate without amendment, WCAM: contaminated substrate amended with wood chips.

**Table S5.** Statistical analysis of properties measured in bulk, rhizosphere, and deep substrates at the end of the phytoremediation test with *H. tyrrhenicum* in refinery substrate with aged contamination unamended (UNAM) and amended (WCAM) with wood chips.

|                                                        |       |        | Kruskal-Wallis |       |
|--------------------------------------------------------|-------|--------|----------------|-------|
| mean                                                   |       | dev.st | Chi-sqr        | p     |
| Bulk substrate                                         |       |        |                |       |
| Substrate moisture (%)                                 |       |        |                |       |
| UNAM                                                   | 10%   | 6%     | 6.82           | 0.009 |
| WCAM                                                   | 33%   | 8%     |                |       |
| Substrate pH (H2O)                                     |       |        |                |       |
| UNAM                                                   | 8.1   | 0.2    | 5.28           | 0.021 |
| WCAM                                                   | 7.8   | 0.1    |                |       |
| Dehydrogenase activity (INT-F g-1 wet w)               |       |        |                |       |
| UNAM                                                   | 42.0  | 6.7    | 3.94           | 0.047 |
| WCAM                                                   | 50.5  | 5.9    |                |       |
| Viable titer of fungi (log MPN g-1 wet w)              |       |        |                |       |
| UNAM                                                   | 4.0   | 0.5    | 6.82           | 0.009 |
| WCAM                                                   | 5.7   | 0.3    |                |       |
| Viable titer of bacteria (log MPN g-1 wet w)           |       |        |                |       |
| UNAM                                                   | 6.1   | 0.1    | 6.82           | 0.009 |
| WCAM                                                   | 6.5   | 0.2    |                |       |
| Viable titer of diesel degraders (log MPN g-1 wet w)   |       |        |                |       |
| UNAM                                                   | 6.4   | 0.2    | 6.82           | 0.007 |
| WCAM                                                   | 7.2   | 0.2    |                |       |
| Viable titer of paraffin degraders (log MPN g-1 wet w) |       |        |                |       |
| UNAM                                                   | 6.7   | 0.3    | 4.36           | 0.036 |
| WCAM                                                   | 7.1   | 0.2    |                |       |
| Total petroleum hydrocarbons (g kg-1 dry w)            |       |        |                |       |
| UNAM                                                   | 1.8   | 1.0    | 3.15           | 0.076 |
| WCAM                                                   | 0.6   | 0.3    |                |       |
| Rhizosphere substrate                                  |       |        |                |       |
| Dehydrogenase activity (INT-F g-1 wet w)               |       |        |                |       |
| UNAM                                                   | 203.2 | 35.4   | 0.10           | 0.754 |
| WCAM                                                   | 244.6 | 105.7  |                |       |
| Viable titer of fungi (log MPN g-1 wet w)              |       |        |                |       |
| UNAM                                                   | 4.8   | 0.3    | 6.82           | 0.009 |
| WCAM                                                   | 5.6   | 0.1    |                |       |
| Viable titer of bacteria (log MPN g-1 wet w)           |       |        |                |       |
| UNAM                                                   | 7.0   | 0.3    | 0.01           | 0.917 |
| WCAM                                                   | 7.2   | 0.7    |                |       |
| Viable titer of diesel degraders (log MPN g-1 wet w)   |       |        |                |       |
| UNAM                                                   | 7.5   | 0.3    | 0.27           | 0.602 |
| WCAM                                                   | 7.4   | 0.6    |                |       |
| Viable titer of paraffin degraders (log MPN g-1 wet w) |       |        |                |       |
| UNAM                                                   | 7.6   | 0.3    | 1.84           | 0.173 |
| WCAM                                                   | 7.5   | 0.3    |                |       |
| Total petroleum hydrocarbons (g kg-1 dry w)            |       |        |                |       |
| UNAM                                                   | 0.03  | 0.02   | 5.77           | 0.016 |
| WCAM                                                   | 0.16  | 0.13   |                |       |
| Deep substrate                                         |       |        |                |       |
| Total petroleum hydrocarbons (g kg-1 dry w)            |       |        |                |       |
| UNAM                                                   | 3.2   | 1.7    | 3.94           | 0.047 |
| WCAM                                                   | 1.3   | 0.7    |                |       |
